# Supplementary material for: Quantitative Analysis of Genetic and Neuronal Multi-Perturbation Experiments
Source: PubMed Central journal article supplement (PMC1289391; doi:10.1371/journal.pcbi.0010064), 2005-11-25
Supplement: pcbi.0010064.sd003.pdf [file pcbi.0010064.sd003.pdf]

## Text S1: The Axiomatic Basis of the Shapley Value

Let player  $i$  be a *null player* in  $v$  if  $\Delta_i(S) = 0$  for every coalition  $S$  ( $i \notin S$ ). Players  $i$  and  $j$  are *interchangeable* in  $v$  if  $\Delta_i(S) = \Delta_j(S)$  for every coalition  $S$  that contains neither  $i$  nor  $j$ . The Shapley value is the only efficient value that satisfies the three following axioms:

**Axiom 1** (*Symmetry*) If  $i$  and  $j$  are interchangeable in game  $v$  then  $\gamma_i(v) = \gamma_j(v)$ .

Intuitively, this axiom states that the value should not be affected by a mere change in the players' "names".

**Axiom 2** (*Null player property*) If  $i$  is a null player in game  $v$  then  $\gamma_i(v) = 0$ .

This axiom sets the baseline of the value to be zero for a player whose marginal importance is always zero.

**Axiom 3** (*Additivity*) For any two games  $v$  and  $w$  on a set  $N$  of players,  $\gamma_i(v+w) = \gamma_i(v) + \gamma_i(w)$  for all  $i \in N$ , where  $v+w$  is the game defined by  $(v+w)(S) = v(S) + w(S)$ .

This last axiom constrains the value to be consistent in the space of all games.
