# Supplementary material for: Quantitative Analysis of Genetic and Neuronal Multi-Perturbation Experiments
Source: PubMed Central journal article supplement (PMC1289391; doi:10.1371/journal.pcbi.0010064), 2005-11-25
Supplement: pcbi.0010064.st002.pdf [file pcbi.0010064.st002.pdf]

## Table S2: Chemotaxis Contribution Matrix

The matrix portrays the contributions of the 8 neuron pairs across the different attractant tasks, the contributions are normalized such that their sum in each task (row of the matrix) equals to one.  $C_{ij}$  in the matrix denotes the contribution of element  $j$  to task  $i$ . Figure 3 in the main text shows a graphic representation of the contribution matrix.

|           | ASE    | ADF    | ASG     | ASH     | ASI    | ASJ     | ASK     | ADL    |
|-----------|--------|--------|---------|---------|--------|---------|---------|--------|
| Serotonin | 0.4300 | 0.0383 | -0.0619 | -0.1055 | 0.1210 | 0.2658  | 0.1628  | 0.1496 |
| Cl        | 0.7084 | 0.0182 | -0.0442 | -0.0460 | 0.0693 | -0.0346 | 0.1387  | 0.1902 |
| cAMP      | 0.7219 | 0.0415 | 0.0159  | -0.0666 | 0.0285 | 0.0857  | 0.1573  | 0.0158 |
| Biotin    | 0.7445 | 0.0172 | 0.0459  | -0.0446 | 0.0569 | 0.1485  | -0.0721 | 0.1036 |
