# Supplementary material for: Quantitative Analysis of Genetic and Neuronal Multi-Perturbation Experiments
Source: PLoS Comput Biol. 2005 Nov 25;1(6):e64. doi: 10.1371/journal.pcbi.0010064 (PMC1289391; doi:10.1371/journal.pcbi.0010064)
Supplement: Table S1 — (53 KB PDF) [file pcbi.0010064.st001.pdf]

**Table S1: Genetic Multiple Knockout Data, post replication repair in yeast *S. cerevisiae*.**

The table presents the genetic multi-knockout experiments performed. Each row summarizes one specific experiment, in which the different genes (columns) are either knocked-out (0) or intact (1). The performance measure of each mutant is the percent of colonies that survive the UV radiation.

| ELG1 | CTF18 | RAD24 | REV3 | RAD18 | Performance |
|------|-------|-------|------|-------|-------------|
| 1    | 1     | 1     | 1    | 1     | 85.7        |
| 0    | 1     | 1     | 1    | 1     | 69.7        |
| 1    | 0     | 1     | 1    | 1     | 69.4        |
| 1    | 1     | 0     | 1    | 1     | 54.7        |
| 1    | 1     | 1     | 0    | 1     | 28.5        |
| 0    | 0     | 1     | 1    | 1     | 33.3        |
| 0    | 1     | 0     | 1    | 1     | 21          |
| 0    | 1     | 1     | 0    | 1     | 24.5        |
| 1    | 0     | 0     | 1    | 1     | 51.9        |
| 1    | 0     | 1     | 0    | 1     | 39.5        |
| 1    | 1     | 0     | 0    | 1     | 1.6         |
| 0    | 0     | 0     | 1    | 1     | 16.4        |
| 0    | 0     | 1     | 0    | 1     | 22.3        |
| 0    | 1     | 0     | 0    | 0     | 0.25        |
| 1    | 1     | 1     | 1    | 0     | 0.143       |
| 0    | 1     | 1     | 1    | 0     | 0.09        |
| 1    | 0     | 1     | 1    | 0     | 0.11        |
| 1    | 1     | 0     | 1    | 0     | 0.026       |
| 0    | 0     | 1     | 1    | 0     | 0.05        |
| 1    | 0     | 0     | 1    | 0     | 0.0025      |
| 1    | 1     | 1     | 0    | 0     | 0.13        |
